# Supplementary material
Source: PubMed Central journal article supplement (PMC4333072)
Supplement: NIHMS640070-supplement-1.pdf [file NIHMS640070-supplement-1.pdf]

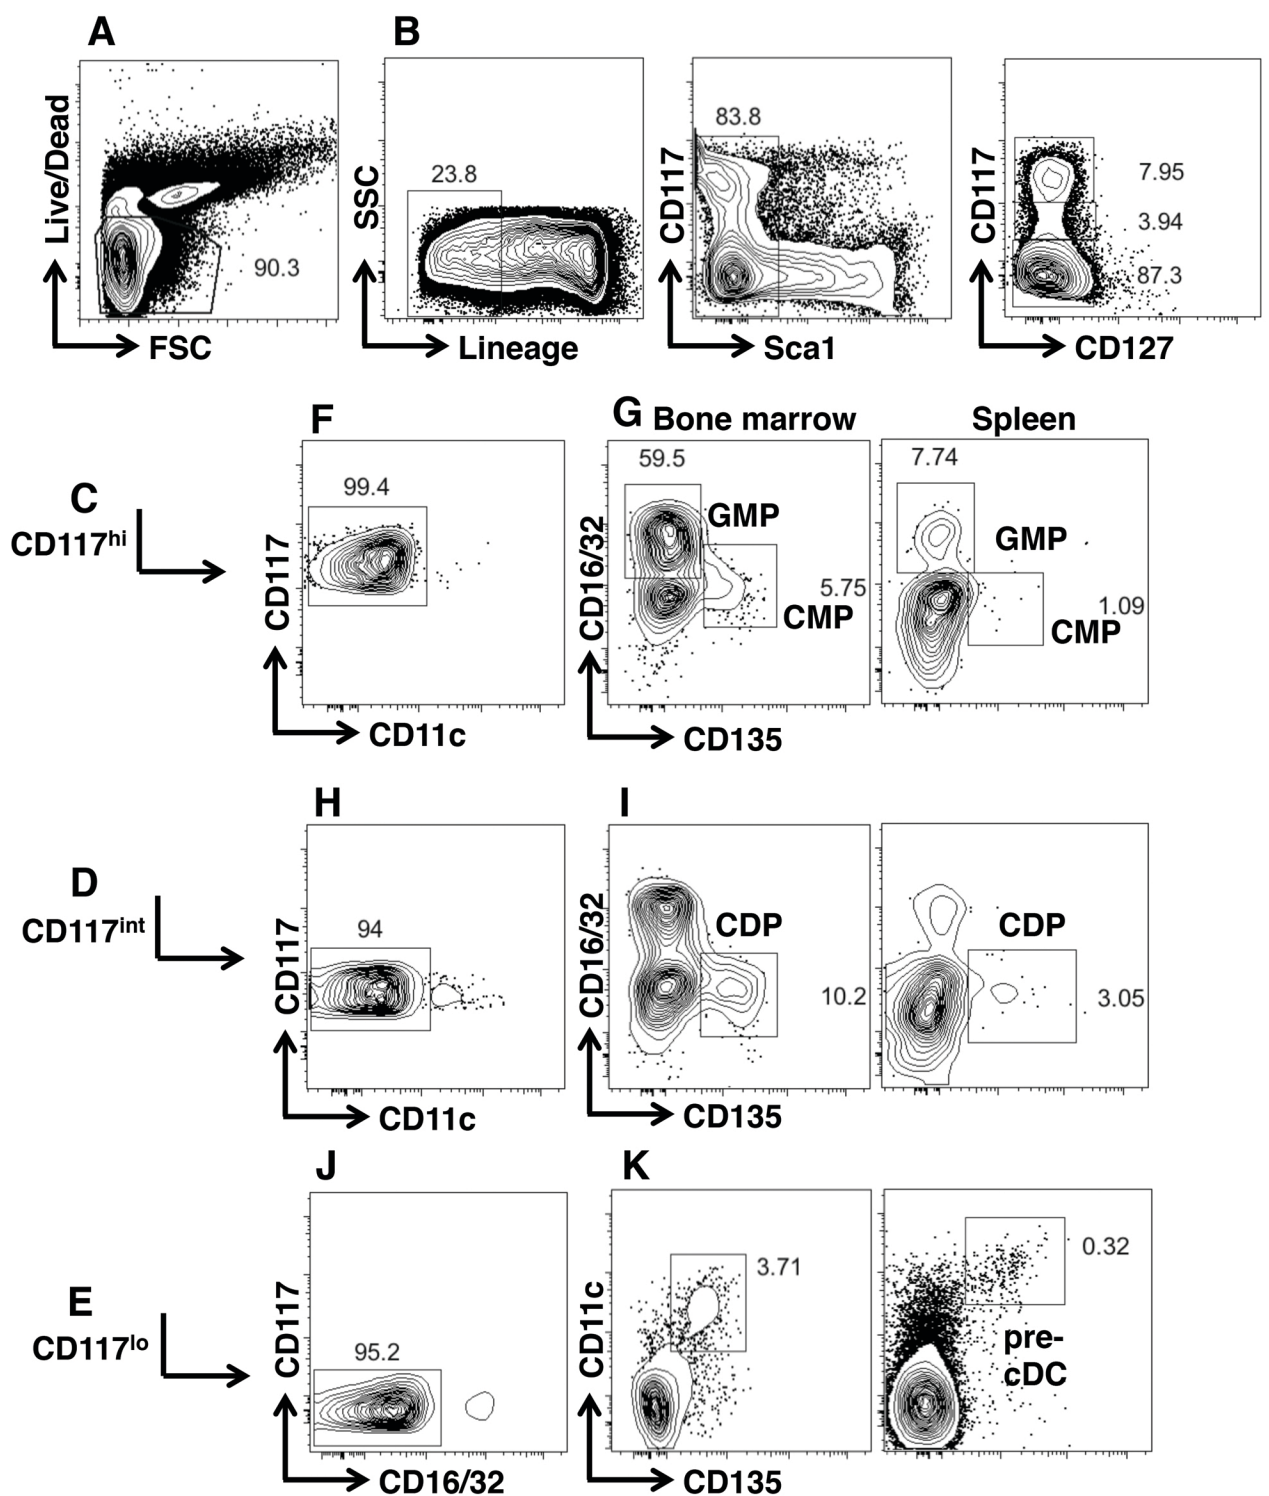

**SUPPLEMENTAL FIGURE 1.** Gating strategy for identification of bone marrow and splenic DC precursors by surface marker expression. Single cell suspensions were generated from bone marrow and spleens of naïve WT mice. Dead cells were initially excluded by Live/Dead staining (A), and cells positive for Lineage, Sca1 and CD127 were further excluded (B). (C-E) Cells were then distinguished by CD117 staining, whereby CMP and GMP were CD117<sup>hi</sup> (C), CDP were CD117<sup>int</sup> (D), and pre-cDC were CD117<sup>lo</sup> (E). (F and G) CD117<sup>hi</sup> cells were subsequently gated on the CD11c<sup>+</sup> population (F); bone marrow and splenic GMP and CMP were identified from the remaining cells by CD16/32 and CD135 expression, where CMP were CD16/32<sup>+</sup>CD135<sup>+</sup> and GMP were CD16/32<sup>+</sup>CD135<sup>-</sup> (G). (H and I) CD117<sup>int</sup> cells were gated on the CD11c<sup>+</sup> population (H); bone marrow and splenic CDP were identified as CD16/32<sup>-</sup> and CD135<sup>+</sup> (I). (J and K) CD117<sup>lo</sup> cells were gated on the CD16/32<sup>-</sup> population (J); pre-cDC were identified as CD11c<sup>+</sup> and CD135<sup>+</sup> (K). Shown are representative plots of each resulting precursor population in both the bone marrow and spleen.
